# Supplementary material
Source: publisher figshare collection journal article supplement (https://gsajournals.figshare.com/ndownloader/files/15456020)
Supplement: Supplementary file 1 [file 15456020]

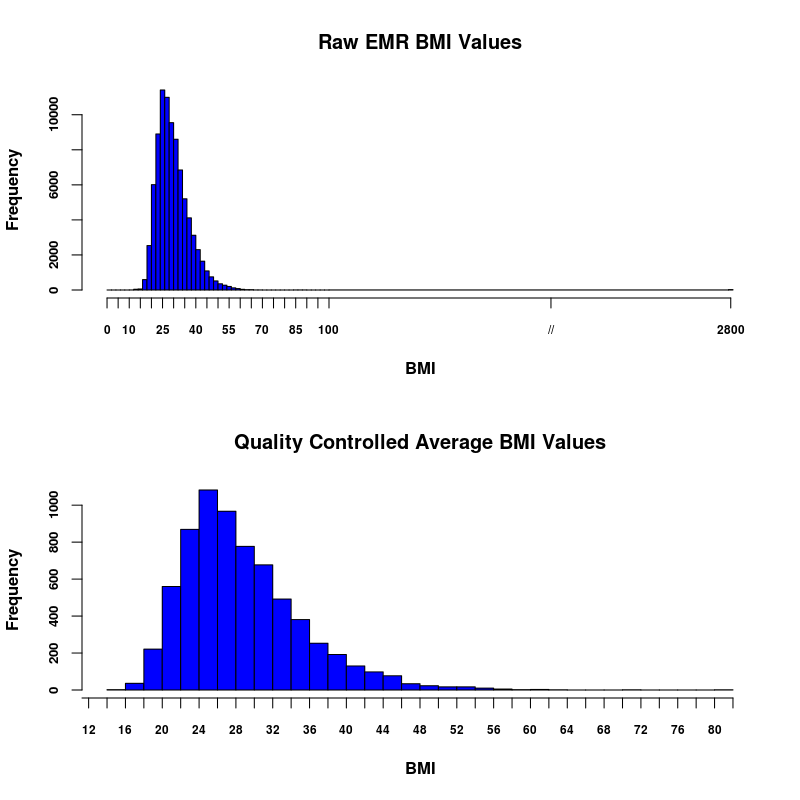


**Figure S1:** **Quality-controlled average BMI values**

This figure illustrates both the raw and normalized BMI values. Due BMI values, there is a break in the x-axis of the raw BMI values shown in the first panel.
